# Supplementary material for: Analytical Variables Affecting Analysis of F2-Isoprostanes and F4-Neuroprostanes in Human Cerebrospinal Fluid by Gas Chromatography/Mass Spectrometry
Source: Hindawi journal article supplement (doi:10.1155/2013/810915), 2013-01-01
Supplement: f1 [file 810915.f1.zip]

Archive with 5 entries (4 files):
- 810915.f1/
- 810915.f1/supplementery figure 1.pdf
- 810915.f1/supplementery figure 2.pdf
- 810915.f1/supplementery figure 3.pdf
- 810915.f1/supplementery figure 4.pdf
