# Supplementary material for: Analytical Variables Affecting Analysis of F2-Isoprostanes and F4-Neuroprostanes in Human Cerebrospinal Fluid by Gas Chromatography/Mass Spectrometry
Source: Hindawi journal article supplement (doi:10.1155/2013/810915), 2013-01-01
Supplement: f1 [file 810915.f1.zip › 810915.f1/supplementery figure 1.pdf]

## Supplemental Figures

m/z 569.4

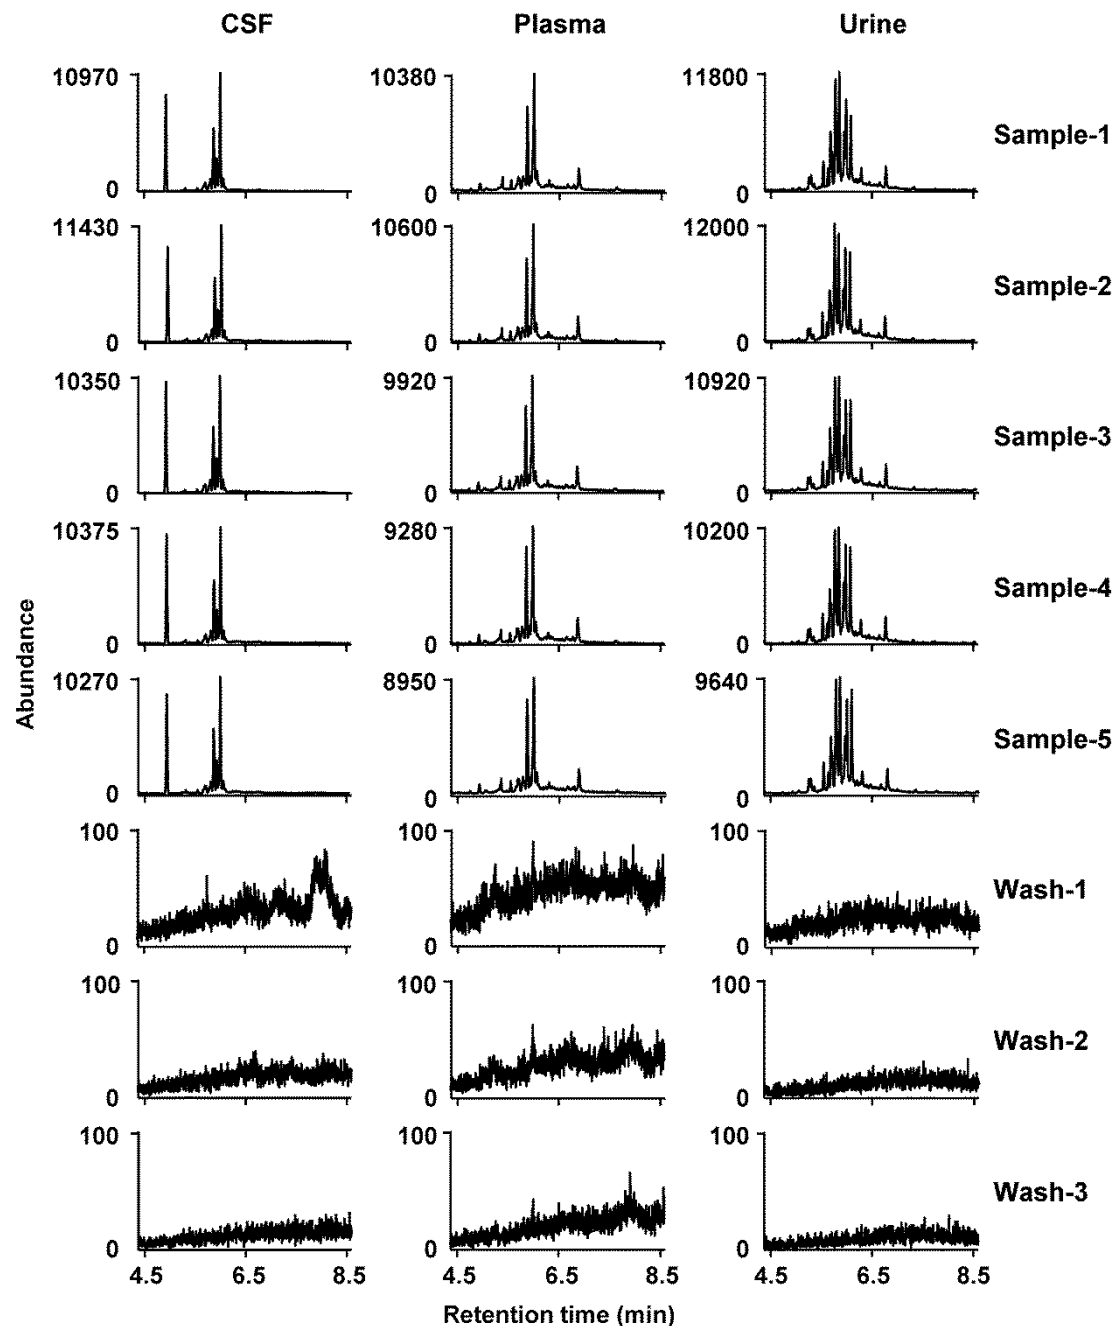

**Supplemental Figure 1.** Chromatograms for the 5 consecutive injections of the same M-CSF sample (left panel), the same plasma sample (middle panel), and the same urine sample (right panel) processed for F<sub>2</sub>-IsoPs analysis (Sample-1 to Sample-5) and the 3 subsequent injections of undecane alone (Wash-1 to Wash-3) at m/z 569.4. They were monitored simultaneously with data shown in Figure 4B described in Figure 3. The chromatograms in the range of 4.4 min to 8.6 min (the end of data acquisition) were compared.
