# Supplementary material for: Analytical Variables Affecting Analysis of F2-Isoprostanes and F4-Neuroprostanes in Human Cerebrospinal Fluid by Gas Chromatography/Mass Spectrometry
Source: Hindawi journal article supplement (doi:10.1155/2013/810915), 2013-01-01
Supplement: f1 [file 810915.f1.zip › 810915.f1/supplementery figure 2.pdf]

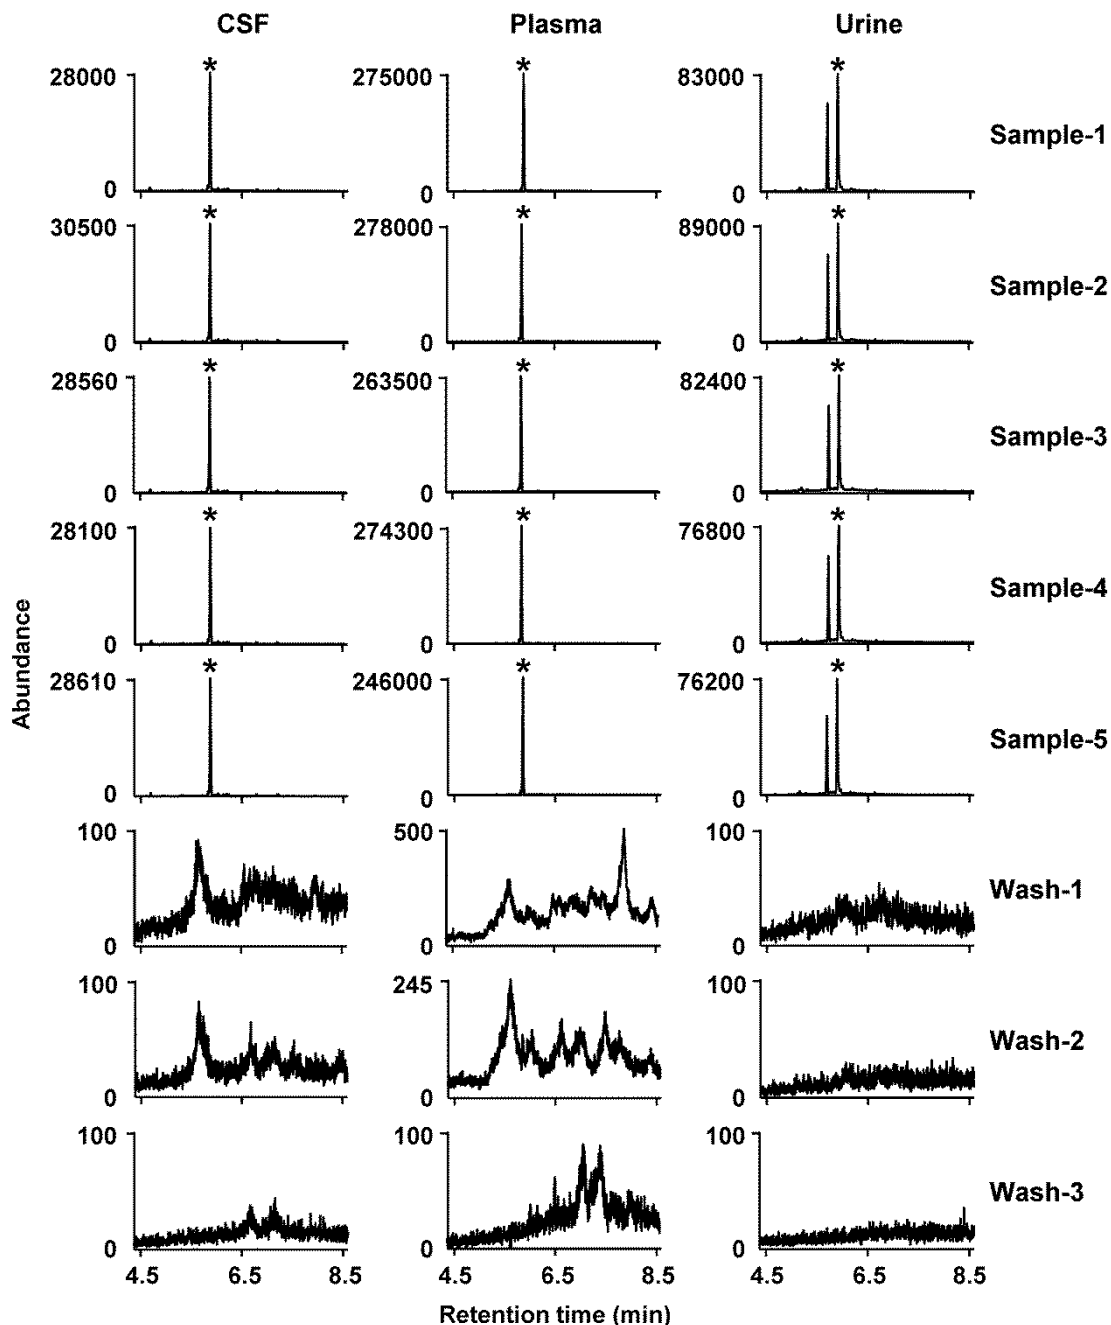

**Supplemental Figure 2.** Chromatograms for the 5 consecutive injections of the same M-CSF sample (left panel), the same plasma sample (middle panel), and the same urine sample (right panel) processed for F<sub>2</sub>-IsoPs analysis (Sample-1 to Sample-5) and the 3 subsequent injections of undecane alone (Wash-1 to Wash-3) at m/z 573.4. They were monitored simultaneously with data shown in Figure 4B. The chromatograms in the range of 4.4 min to 8.6 min (the end of data acquisition) were compared.
