# Supplementary material for: Analytical Variables Affecting Analysis of F2-Isoprostanes and F4-Neuroprostanes in Human Cerebrospinal Fluid by Gas Chromatography/Mass Spectrometry
Source: Hindawi journal article supplement (doi:10.1155/2013/810915), 2013-01-01
Supplement: f1 [file 810915.f1.zip › 810915.f1/supplementery figure 3.pdf]

(a)  $m/z$  569.4

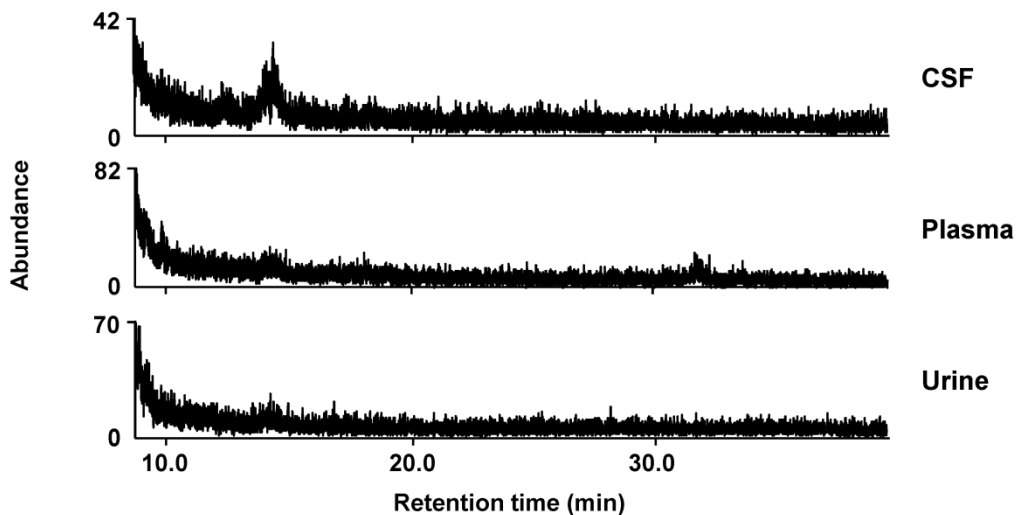

(b)  $m/z$  573.4

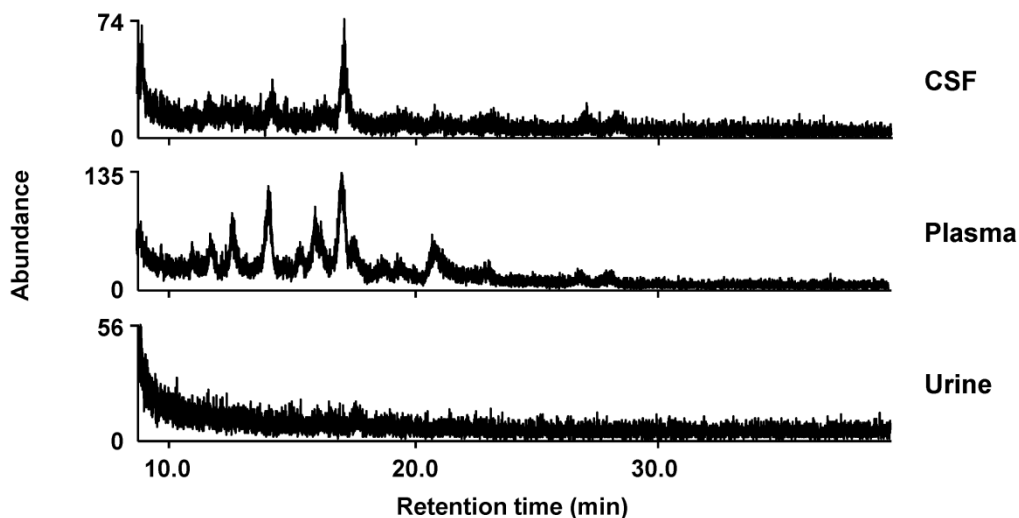

**Supplemental Figure 3.** The chromatograms monitored for the additional 30-min holding (8.6 min to 38.6 min) of the column at 280°C after normal acquisition of data. (a) The chromatograms at  $m/z$  569.4 for the same CSF, plasma, and urine samples described in Figure 4. (b) The chromatograms at  $m/z$  573.4 for the same CSF, plasma, and urine samples described in Figure 4.
