# Supplementary material for: Analytical Variables Affecting Analysis of F2-Isoprostanes and F4-Neuroprostanes in Human Cerebrospinal Fluid by Gas Chromatography/Mass Spectrometry
Source: Hindawi journal article supplement (doi:10.1155/2013/810915), 2013-01-01
Supplement: f1 [file 810915.f1.zip › 810915.f1/supplementery figure 4.pdf]

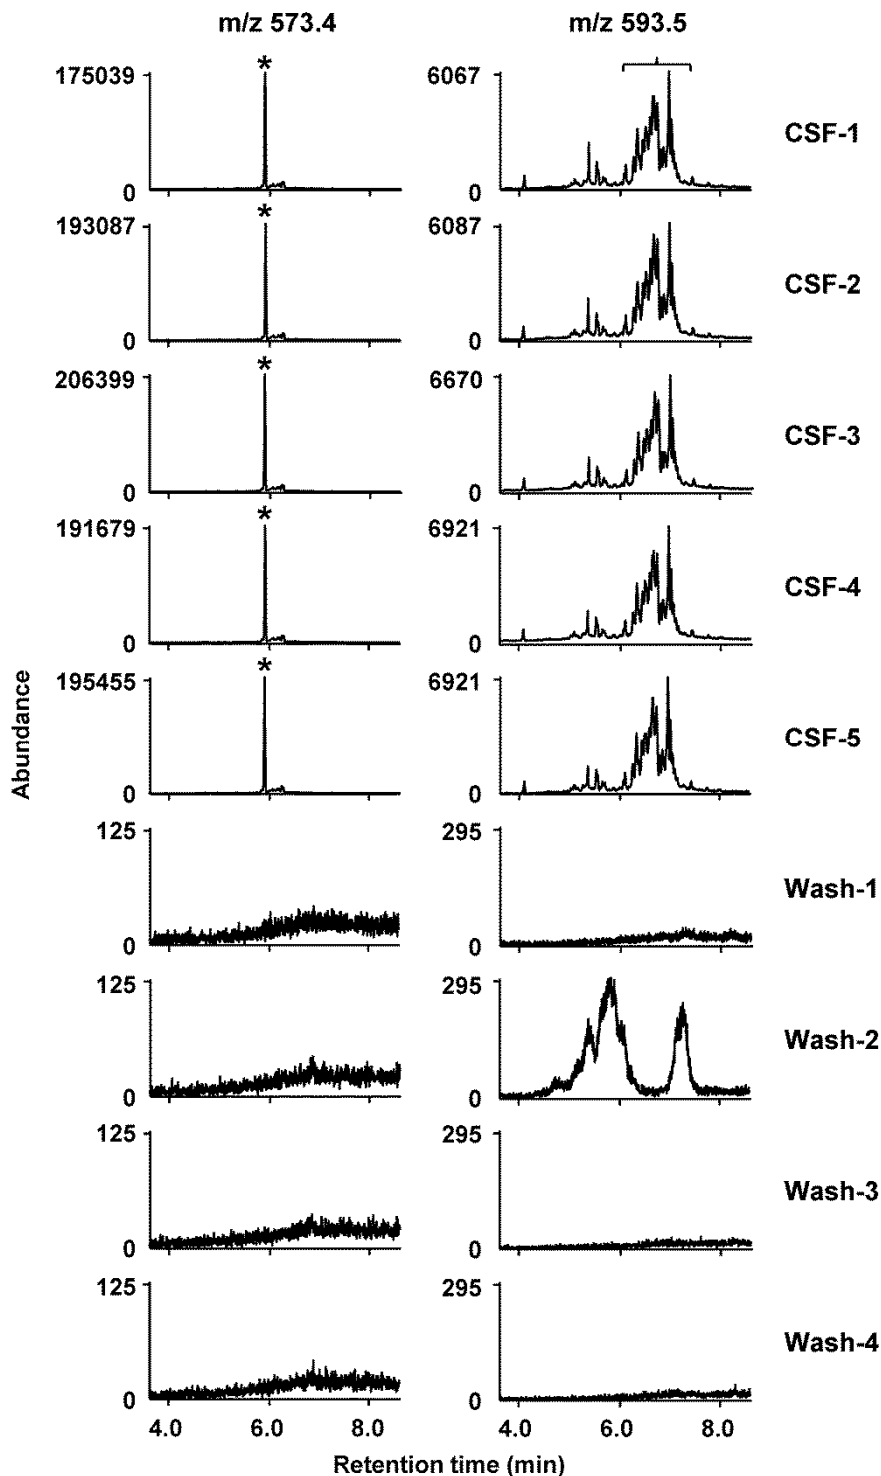

**Supplemental Figure 4.** Chromatograms at  $m/z$  573.4 and  $m/z$  593.5 for the 5 consecutive injections of the same pooled M-CSF sample processed for F<sub>4</sub>-NPs analysis (CSF-1 to CSF-5) and the 4 subsequent injections of undecane alone (Wash-1 to Wash-4) when the additional holding of the column at the high temperature was conducted. They were the same samples described in Figure 3. The chromatograms in the range of 3.6 min to 8.6 min (the end of data acquisition) were compared. The peaks of [<sup>2</sup>H<sub>4</sub>]-15-F<sub>2t</sub>-IsoP at  $m/z$  573.4 are indicated by the asterisks.
